## EDITORIAL VIEWS

Anesthesiology  
78:413-416, 1993  
© 1993 American Society of Anesthesiologists, Inc.  
J. B. Lippincott Company, Philadelphia

### *Inhaled Nitric Oxide*

#### *The Past, the Present, and the Future*

A decade ago, nitric oxide (NO) was viewed primarily as a toxic gas responsible for a portion of the morbidity related to air pollution. In contrast, NO currently is recognized as a major endogenous mediator of multiple physiologic processes, and the use of inhaled NO is expanding rapidly into anesthesia and critical care. This article will review the development of inhaled NO therapy, will summarize the current status of this agent, and will speculate on its eventual applications.

During the early 1980s, there developed an increasing understanding of the ability of the endothelium to modulate vascular tone. For example, acetylcholine may produce vasodilation in vessels with intact endothelium but vasoconstriction in vessels denuded of endothelium. Thus, when appropriately stimulated, the endothelium is able to produce substances that dilate the adjacent vascular smooth muscle. In 1987, NO was identified as the major endothelium-derived relaxing factor.<sup>1</sup> Nitric oxide diffuses from the endothelium into vascular smooth muscle, where it activates soluble guanylate cyclase; the subsequent increase in levels of intracellular cyclic guanosine monophosphate produces smooth muscle vasodilation. Endothelium-independent nitrovasodilators such as nitroglycerin and nitroprusside directly result in intracellular release of NO and subsequent guanylate cyclase activation. The role of endogenous NO in the regulation of vascular tone in normal and in disease states is a rapidly growing area of investigation in vascular biology.<sup>1</sup> Increased NO synthesis may be responsible for vasodilation in septic shock<sup>2</sup> so that inhibition of NO synthesis may be an effective therapy of hypotension.<sup>3</sup> In addition, NO appears to be a major endogenous neurotransmitter.<sup>4</sup>

The decision to use inhaled NO as a therapy for pulmonary disease required understanding several additional concepts. Nitric oxide is not effective during systemic administration because NO is extremely rapidly inactivated by hemoglobin.<sup>5</sup> Thus, exogenous in-

haled NO may diffuse from the alveoli to pulmonary vascular smooth muscle and produce pulmonary vasodilation, but any NO that diffuses into blood will be inactivated before it can produce systemic effects. Therefore, inhaled NO may produce selective pulmonary vasodilation, a goal that has previously eluded research. The final concept required to develop the therapeutic use of inhaled NO was the understanding that NO *per se* has relatively low toxicity<sup>6,7</sup>; in contrast, nitrogen oxides such as NO<sub>2</sub> that form from NO over time are the major toxic compounds.<sup>8</sup> Thus, inhaled NO in theory may be both safe and effective as a selective pulmonary vasodilator.

The idea that inhaled NO may produce selective pulmonary vasodilation led to animal studies in which pulmonary hypertension was produced by global hypoxia, thromboxane-mimetic infusion, or heparin-protamine interactions.<sup>9,10</sup> These studies convincingly demonstrated that inhaled NO at concentrations of 5–80 ppm produces pulmonary vasodilation that is both rapid and completely reversible. Importantly, no systemic vasodilation or other adverse effects occurred in these studies.

These animal studies rapidly have led to clinical studies of the pulmonary vasodilator effects of inhaled NO. Two such studies appear in this issue of ANESTHESIOLOGY.<sup>11,12</sup> Frostell *et al.* describe the effects of inhaled NO during hypoxia in human volunteers. In the absence of hypoxia, inhaled NO did not alter pulmonary or systemic hemodynamics. Inhalation of 12% O<sub>2</sub> alone increased pulmonary artery pressure (PAP) from 15 to 20 mmHg and increased pulmonary vascular resistance (PVR) from 73 to 125 dynes · s · cm<sup>-5</sup>. Addition of 40 ppm NO to the inhaled gas decreased PAP and PVR to control values but did not affect mean arterial pressure (MAP) or systemic vascular resistance (SVR). The effect of inhaled NO occurred within the first minute of inhalation. Studies in two subjects suggested that the maximal effect of inhaled NO occurred at concentrations of 10 ppm NO. Discontinuation of inhaled NO during hypoxia resulted in only a partial increase in PAP and PVR. These data confirm the results of animal

Accepted for publication December 22, 1992.

Key words: Lung; respiratory distress syndrome; vasculature; shunting. Pharmacology: nitric oxide. Toxicity.

- inhibitors on hypotension in patients with septic shock. *Lancet* 338:1557-1558, 1991
4. Snyder SH, Bredt DS: Biological roles of nitric oxide. *Sci Am* 266:62-77, 1992
  5. Gibson QH, Roughton FJW: The kinetics of equilibria of the reactions of nitric oxide with sheep hemoglobin. *J Physiol (Lond)* 136:507-526, 1957
  6. Oda H, Nogami H, Kusomoto S, Nakajima T, Kurata A, Imai K: Long-term exposure to nitric oxide in mice. *J Jpn Soc Air Pollut* 11:150-160, 1976
  7. Hugod C: Effects of exposure to 43 ppm nitric oxide and 3.6 ppm nitrogen dioxide on rabbit lungs. *Int Arch Occup Environ Health* 42:159-167, 1975
  8. Nakajima T, Oda H, Kusomoto S, Nogami H: Biological effects of nitrogen dioxide and nitric oxide, *Nitric Oxides and Their Effects on Health*. Edited by Lee SD. Ann Arbor, Ann Arbor Science, 1980, pp 121-141
  9. Frostell C, Fratacci MD, Wain JC, Jones R, Zapol WM: Inhaled nitric oxide: A selective pulmonary vasodilator reversing hypoxic pulmonary vasoconstriction. *Circulation* 83:2038-2047, 1991
  10. Fratacci MD, Frostell CG, Chen TY, Wain JC, Robinson DR, Zapol WM: Inhaled nitric oxide: A selective pulmonary vasodilator of heparin protamine vasoconstriction in sheep. *ANESTHESIOLOGY* 75:990-999, 1991
  11. Frostell CG, Blomquist H, Hedenstierna G, Lundberg J, Zapol WM: Inhaled nitric oxide selectively reverses human hypoxic pulmonary vasoconstriction without causing systemic vasodilation. *ANESTHESIOLOGY* 78:427-435, 1993
  12. Selldén H, Winberg P, Gustafsson LE, Lundell B, Böök K, Frostell CG: Inhalation of nitric oxide-reduced pulmonary hypertension after cardiac surgery in a 3.2-kg infant. *ANESTHESIOLOGY* 78:577-580, 1993
  13. Girard C, Lehot JJ, Pannetier JC, Filley S, Ffrench P, Estanove S: Inhaled nitric oxide after mitral valve replacement in patients with chronic pulmonary artery hypertension. *ANESTHESIOLOGY* 77:880-883, 1992
  14. Pepke-Zaba J, Higenbottam TW, Dinh-Xuan AT, Stone D, Wallwork J: Inhaled nitric oxide as a cause of selective pulmonary vasodilation in pulmonary hypertension. *Lancet* 338:1173-1174, 1991
  15. Roberts JD Jr, Lang P, Bigatello LM, Vlahakes GJ, Zapol WM: Inhaled nitric oxide in congenital heart disease. *Circulation*, in press
  16. Kinsella JP, Neish SR, Sheffer E, Abram SH: Low-dose inhalational nitric oxide in persistent pulmonary hypertension of the newborn. *Lancet* 340:819-820, 1992
  17. Roberts JD, Polaner DM, Lang P, Zapol WM: Inhaled nitric oxide in persistent pulmonary hypertension of the newborn. *Lancet* 340:818-819, 1992
  18. Zapol WM, Snyder MT: Pulmonary artery hypertension in severe acute respiratory failure. *N Engl J Med* 296:476-480, 1977
  19. Zapol WM, Snider MT, Ric MA, Frikker M, Quinn DA: Pulmonary circulation during ARDS, *Acute Respiratory Failure*, vol 24. Edited by Zapol WM, Falke K. New York, Marcel Dekker, 1985, pp 241-273
  20. Radermacher P, Santak P, Becker H, Falke KJ: Prostaglandin E<sub>1</sub> and nitroglycerin reduces pulmonary capillary pressure but worsens  $\dot{V}_A/\dot{Q}$  distribution in patients with ARDS. *ANESTHESIOLOGY* 70:601-606, 1989
  21. Rossaint R, Falke KJ, Keitel M, Lopez F, Pison U, Slama K, Grüning T, Zapol WM: Inhaled nitric oxide in contrast to infused prostacyclin selectively reduces pulmonary hypertension and improves gas exchange in severe ARDS (abstr). *Am Rev Respir Dis* 145:A185, 1992
  22. Rossaint R, Falke KJ, Keitel M, Slama K, Gerlach H, Hahn M, Zapol WM: Successful treatment of severe adult respiratory distress syndrome with inhaled nitric oxide (abstr). *Am Rev Respir Dis* 145:A80, 1992
  23. Bigatello LM, Hurford WE, Kacmarek RM, Roberts JD, Zapol WM: Inhaled nitric oxide is a selective pulmonary vasodilator in septic patients with severe ARDS (abstr). *Am Rev Respir Dis* 145:A185, 1992
  24. Dupuy PM, Shore SA, Drazen JM, Frostell CG, Hill WA, Zapol WM: Bronchodilator action of inhaled nitric oxide in guinea pigs. *J Clin Invest* 90:421-428, 1992
  25. Moutafis M, Law-Koune JD, Fischler B: NO<sub>2</sub> concentrations during inhalation of nitric oxide in pigs (abstr). *ANESTHESIOLOGY* 77:A1230, 1992
  26. Bylin G, Hedenstierna G, Lindrall T, Sundin B: Ambient nitrogen dioxide concentration increases bronchial responsiveness in subjects with mild asthma. *Eur Respir J* 1:606-612, 1988
  27. Gillespie JR, Berry JB, White LL, Lindsay P: Effects on pulmonary function of low-level nitrogen dioxide exposure, *Nitric Oxides and Their Effects on Health*. Edited by Lee SD. Ann Arbor, Ann Arbor Science, 1980, pp 231-242
  28. Sandström T, Wilnerzon-Thörn R, Bjermer L, Stjernberg N: Repeated exposure to nitrogen dioxide causes a different cell response in the lungs in comparison with a single exposure (abstr). *Am Rev Respir Dis* 145:A455, 1992
  29. Frampton MW, Voter KZ, Morrow PE, Roberts NJ, Gavras JB, Utell MJ: Effects of NO<sub>2</sub> exposure on human host defense (abstr). *Am Rev Respir Dis* 145:A455, 1992
